# Supplementary material for: Developing a conceptual model of symptoms and impacts in progressive fibrosing interstitial lung disease to evaluate patient-reported outcome measures
Source: PubMed Central journal article supplement (PMC9062300; doi:10.1183/23120541.00681-2021), 2022-05-03
Supplement: 00681-2021.SUPPLEMENT.pdf [file 00681-2021.SUPPLEMENT.pdf]

1  
2  
3  
4  
5  
6  
7  
8  
9  
10  
11  
12  
13  
14  
15  
16  
17  
18  
19  
20  
21  
22  
23  
24  
25

## Supplementary materials

### Developing a conceptual model of symptoms and impacts in progressive fibrosing interstitial lung disease to evaluate patient-reported outcome measures

**Authors:** Marlies Wijsenbeek,<sup>1</sup> Maria Molina-Molina,<sup>2</sup> Olivier Chassany,<sup>3,4</sup> John Fox,<sup>5</sup> Liam Galvin,<sup>6</sup> Klaus Geissler,<sup>7</sup> Katherine M. Hammitt,<sup>8</sup> Michael Kreuter,<sup>9</sup> Teng Moua,<sup>10</sup> Emily C. O'Brien,<sup>11</sup> Ashley F. Slagle,<sup>12</sup> Anna Krasnow,<sup>13</sup> Matthew Reaney,<sup>14</sup> Michael Baldwin,<sup>15</sup> Natalia Male,<sup>15</sup> Klaus B. Rohr,<sup>15</sup> Jeff Swigris,<sup>16</sup> Katerina Antoniou<sup>17</sup>

**Affiliations:** <sup>1</sup>Department of Respiratory Medicine, Erasmus University Medical Centre, Rotterdam, The Netherlands; <sup>2</sup>Department of Pneumology, Unit of Interstitial Lung Diseases, University Hospital of Bellvitge, Institute for Biomedical Research (IDIBELL), Barcelona, Spain; <sup>3</sup>Patient-Reported Outcomes Research Unit, Université de Paris, Paris, France; <sup>4</sup>Health Economics Clinical Trial Unit (URC-ECO), Hotel-Dieu Hospital, AP-HP, Paris, France; <sup>5</sup>Foxworthy Healthcare Consulting, Ada, MI, USA; <sup>6</sup>European Idiopathic Pulmonary Fibrosis and Related Disorders Federation, Overijse, Belgium; <sup>7</sup>Patient Support Group Lungenfibrose eV, Essen, Germany; <sup>8</sup>Sjögren's Foundation, Reston, VA, USA; <sup>9</sup>Center for Interstitial and Rare Lung Diseases, Department of Pneumology, Thoraxklinik, University of Heidelberg, Member of the German Center for Lung Research, Heidelberg, Germany; <sup>10</sup>Division of Pulmonary and Critical Care Medicine, Mayo Clinic, Rochester, MN, USA; <sup>11</sup>Duke Clinical Research Institute, Durham, NC, USA; <sup>12</sup>Aspen Consulting, LLC, Steamboat Springs, CO, USA; <sup>13</sup>Patient Centred Solutions, IQVIA, London, UK; <sup>14</sup>Patient Centred Solutions, IQVIA, Reading, UK; <sup>15</sup>Boehringer Ingelheim International GmbH, Ingelheim am Rhein, Germany; <sup>16</sup>National Jewish Health, Denver, CO, USA; <sup>17</sup>Laboratory of Cellular and Molecular Pneumonology, Department of Respiratory Medicine, School of Medicine, University of Crete, Crete, Greece.

26 **Supplementary Table 1** Search strategy in Embase, Medline and Medline in Process

| ID | Search                                                                                                                                                                                                                                                                                                            | Hits    |
|----|-------------------------------------------------------------------------------------------------------------------------------------------------------------------------------------------------------------------------------------------------------------------------------------------------------------------|---------|
| 1  | exp Lung Diseases, Interstitial/ 131609                                                                                                                                                                                                                                                                           | 131,609 |
| 2  | exp Idiopathic Pulmonary Fibrosis/                                                                                                                                                                                                                                                                                | 28,602  |
| 3  | (ILD or 'ILDs' or 'interstitial lung disease' or 'interstitial lung diseases' or 'idiopathic pulmonary fibrosis' or 'cryptogenic fibrosing alveolitis' or 'fibrocystic pulmonary dysplasia' or 'hamman rich' or 'interstitial pneumonitis').ab,ti.                                                                | 54,738  |
| 4  | ('progressive fibrosis' or 'progressive fibrosing' or (('progressive' or 'progressing') and ('fibrosis' or 'fibroses' or 'fibrosing'))).ti,ab.                                                                                                                                                                    | 31,812  |
| 5  | ('fast progressing' or 'fast progression' or 'rapid progress' or 'rapid progressing' or 'rapid progression' or 'rapidly progressive' or 'progressive phenotype' or ('progressive' and 'phenotype')).ti,ab.                                                                                                        | 71,259  |
| 6  | ('pf ild' or 'pf ilds' or 'IPF' or 'pulmonary fibrosis interstitial lung disease' or 'pulmonary fibrosis interstitial lung diseases' or 'progressive fibrosis interstitial lung disease' or 'progressive fibrosis interstitial lung diseases' or 'idiopathic pulmonary fibrosis').ti.                             | 12,298  |
| 7  | (iNSIP or 'non-specific interstitial pneumonia' or 'Unclassifiable idiopathic interstitial pneumonias' or 'SSc-ILD' or 'RA-ILD' or 'MCTD-ILD' or 'Sjogren syndrome-related ILD' or 'IPAF' or 'interstitial pneumonia with autoimmune features' or 'Chronic hypersensitivity pneumonitis' or 'Sarcoidosis').ab,ti. | 57,505  |
| 8  | (1 or 2 or 3) and (4 or 5)                                                                                                                                                                                                                                                                                        | 12,997  |
| 9  | 6 or 7 or 8                                                                                                                                                                                                                                                                                                       | 82,258  |
| 10 | exp Quality of Life/                                                                                                                                                                                                                                                                                              | 668,202 |
| 11 | exp Activities of Daily Living/ or exp Patient Reported Outcome                                                                                                                                                                                                                                                   | 212,332 |

| ID | Search                                                                                                                                                                                                                                                                                                            | Hits      |
|----|-------------------------------------------------------------------------------------------------------------------------------------------------------------------------------------------------------------------------------------------------------------------------------------------------------------------|-----------|
|    | Measures/                                                                                                                                                                                                                                                                                                         |           |
| 12 | '(clinical manifestations' or 'clinical characteristics').ab,ti.                                                                                                                                                                                                                                                  | 300,417   |
| 13 | '(patient reported outcomes' or 'PRO' or 'patient-reported' or 'patient perspective' or 'patient-centricity' or 'patient-centred' or 'patient-centered' or 'patient's perception' or 'patient's perceptions' or 'patient-rated' or 'patientrating').ab,ti.                                                        | 620,676   |
| 14 | '(signs' or 'symptoms' or 'impacts').ab,ti.                                                                                                                                                                                                                                                                       | 2,870,932 |
| 15 | '(dyspnea' or 'dyspnoea' or 'cough' or 'fatigue' or 'pain').ab,ti.                                                                                                                                                                                                                                                | 1,866,194 |
| 16 | 10 or 11 or 12 or 13 or 14 or 15                                                                                                                                                                                                                                                                                  | 5,606,461 |
| 17 | (('experience' or 'experiences' or 'experienced' or 'self report*' or 'self evaluat*' or 'self completed' or 'self administered' or 'self assess*' or 'diary' or 'diaries' or 'qualitative' or 'interview*' or ('concept' and 'elicitation')) and ('patient' or 'patients' or 'participant' or 'subject')).ab,ti. | 1,900,603 |
| 18 | '(patient interview' or 'patient interviews' or 'qualitative interview' or 'qualitative interviews' or 'semi-structured interviews' or 'semi-structured interview' or 'survey' or 'conceptual model' or 'focus group').ab,ti.                                                                                     | 1,303,240 |
| 19 | '(study' and ('longitudinal' or 'observational' or 'cohort' or 'case series' or 'humanistic')).ab,ti.                                                                                                                                                                                                             | 1,684,215 |
| 20 | 17 or 18 or 19                                                                                                                                                                                                                                                                                                    | 4,471,118 |
| 21 | 9 and 16 and 20                                                                                                                                                                                                                                                                                                   | 2,039     |
| 22 | limit 21 to yr="2010 -Current"                                                                                                                                                                                                                                                                                    | 1,633     |
| 23 | remove duplicates from 22                                                                                                                                                                                                                                                                                         | 1,278     |

28 **Supplementary Table 2** Search strategy in Cochrane

| ID | Search strategy                                                                                                                                                                                                                                                                                                                                                                                                             | Hits  |
|----|-----------------------------------------------------------------------------------------------------------------------------------------------------------------------------------------------------------------------------------------------------------------------------------------------------------------------------------------------------------------------------------------------------------------------------|-------|
| #1 | "lung diseases, interstitial"[MeSH Terms]                                                                                                                                                                                                                                                                                                                                                                                   | 786   |
| #2 | "idiopathic pulmonary fibrosis"[MeSH Terms]                                                                                                                                                                                                                                                                                                                                                                                 | 285   |
| #3 | ILD:ti,ab,kw OR "ILDs":ti,ab,kw OR "interstitial lung disease":ti,ab,kw<br>OR "interstitial lung diseases":ti,ab,kw OR "idiopathic pulmonary<br>fibrosis":ti,ab,kw OR "cryptogenic fibrosing alveolitis":ti,ab,kw OR<br>"fibrocystic pulmonary dysplasia":ti,ab,kw OR "hamman rich":ti,ab,kw<br>OR "interstitial pneumonitis":ti,ab,kw                                                                                      | 2,014 |
| #4 | "progressive fibrosis":ti,ab,kw OR "progressive fibrosing":ti,ab,kw OR<br>(("progressive":ti,ab,kw OR "progressing":ti,ab,kw) AND<br>("fibrosis":ti,ab,kw OR "fibroses":ti,ab,kw OR "fibrosing":ti,ab,kw))                                                                                                                                                                                                                  | 615   |
| #5 | "fast progressing":ti,ab,kw OR "fast progression":ti,ab,kw OR "rapid<br>progress":ti,ab,kw OR "rapid progressing":ti,ab,kw OR "rapid<br>progression":ti,ab,kw OR "rapidly progressive":ti,ab,kw OR<br>"progressive phenotype":ti,ab,kw OR ("progressive":ti,ab,kw AND<br>"phenotype":ti,ab,kw)                                                                                                                              | 657   |
| #6 | "pf ild"[Title] OR "pf ilds"[Title] OR "IPF"[Title]                                                                                                                                                                                                                                                                                                                                                                         | 877   |
| #7 | iNSIP:ti,ab,kw OR "non-specific interstitial pneumonia":ti,ab,kw OR<br>"Unclassifiable idiopathic interstitial pneumonias":ti,ab,kw OR "SSc-<br>ILD":ti,ab,kw OR "RA-ILD":ti,ab,kw OR "MCTD-ILD":ti,ab,kw OR<br>"Sjogren syndrome-related ILD":ti,ab,kw OR "IPAF":ti,ab,kw OR<br>"interstitial pneumonia with autoimmune features":ti,ab,kw OR "Chronic<br>hypersensitivity pneumonitis":ti,ab,kw OR "Sarcoidosis":ti,ab,kw | 747   |
| #8 | (#1 OR #2 OR #3) AND (#4 OR #5)                                                                                                                                                                                                                                                                                                                                                                                             | 172   |
| #9 | #6 OR #7 OR #8                                                                                                                                                                                                                                                                                                                                                                                                              | 1,658 |

| ID  | Search strategy                                                                                                                                                                                                                                                                                                                                                                                                                                                            | Hits    |
|-----|----------------------------------------------------------------------------------------------------------------------------------------------------------------------------------------------------------------------------------------------------------------------------------------------------------------------------------------------------------------------------------------------------------------------------------------------------------------------------|---------|
| #10 | "quality of life"[MeSH terms]                                                                                                                                                                                                                                                                                                                                                                                                                                              | 23,061  |
| #11 | "patient reported outcome measures"[MeSH Terms]                                                                                                                                                                                                                                                                                                                                                                                                                            | 492     |
| #12 | "activities of daily living"[MeSH Terms]                                                                                                                                                                                                                                                                                                                                                                                                                                   | 9,063   |
| #13 | "patient reported outcomes":ti,ab,kw OR "PRO":ti,ab,kw OR "patient-reported":ti,ab,kw OR "patient perspective":ti,ab,kw OR "patient-centricity":ti,ab,kw OR "patient-centred":ti,ab,kw OR "patient-centered":ti,ab,kw OR "patient's perception":ti,ab,kw OR "patient's perceptions":ti,ab,kw OR "patient-rated":ti,ab,kw OR "patient-rating":ti,ab,kw                                                                                                                      | 30,420  |
| #14 | "signs":ti,ab,kw OR "symptoms":ti,ab,kw OR "impacts":ti,ab,kw                                                                                                                                                                                                                                                                                                                                                                                                              | 164,075 |
| #15 | "clinical manifestations":ti,ab,kw OR "clinical characteristics":ti,ab,kw                                                                                                                                                                                                                                                                                                                                                                                                  | 6,263   |
| #16 | "dyspnea":ti,ab,kw or "dyspnoea":ti,ab,kw or "cough":ti,ab,kw or "fatigue":ti,ab,kw or "pain":ti,ab,kw                                                                                                                                                                                                                                                                                                                                                                     | 204,604 |
| #17 | #10 OR #11 OR #12 OR #13 OR #14 OR #15 OR #16                                                                                                                                                                                                                                                                                                                                                                                                                              | 368,634 |
| #18 | ("experience":ti,ab,kw OR "experiences":ti,ab,kw OR "experienced":ti,ab,kw OR "self report*":ti,ab,kw OR "self evaluat*":ti,ab,kw OR "self completed":ti,ab,kw OR "self administered":ti,ab,kw OR "self assess*":ti,ab,kw OR "diary":ti,ab,kw OR "diaries":ti,ab,kw OR "qualitative":ti,ab,kw OR "interview*":ti,ab,kw OR ("concept":ti,ab,kw AND "elicitation":ti,ab,kw)) AND ("patient":ti,ab,kw OR "patients":ti,ab,kw OR "participant":ti,ab,kw OR "subject":ti,ab,kw) | 105,049 |
| #19 | "patient interview":ti,ab,kw OR "patient interviews":ti,ab,kw OR "qualitative interview":ti,ab,kw OR "qualitative interviews":ti,ab,kw OR "semi-structured interviews":ti,ab,kw OR "semi-structured interview":ti,ab,kw OR "survey":ti,ab,kw OR "conceptual                                                                                                                                                                                                                | 32,096  |

| ID  | Search strategy                                                                                                                                                                                    | Hits    |
|-----|----------------------------------------------------------------------------------------------------------------------------------------------------------------------------------------------------|---------|
|     | model":ti,ab,kw OR "focus group":ti,ab,kw                                                                                                                                                          |         |
| #20 | "study":ti,ab,kw AND ("longitudinal":ti,ab,kw OR "observational":ti,ab,kw OR "cohort":ti,ab,kw OR "case series":ti,ab,kw OR "humanistic":ti,ab,kw)                                                 | 70,256  |
| #21 | ("double blind":ti,ab,kw OR "double blinded":ti,ab,kw OR RCT:ti,ab,kw OR Randomi*:ti,ab,kw OR controlled:ti,ab,kw OR controled:ti,ab,kw OR control:ti,ab,kw OR Placebo:ti,ab,kw OR Trial:ti,ab,kw) | 314,785 |
| #22 | (Study:ti,ab,kw OR studies:ti,ab,kw) AND (open:ti,ab,kw OR open-label:ti,ab,kw OR non-randomised:ti,ab,kw OR nonrandomized:ti,ab,kw OR "cohort":ti,ab,kw)                                          | 51,349  |
| #23 | #18 OR #19 OR #20 OR #21 OR #22                                                                                                                                                                    | 473,612 |
| #24 | #9 AND #17 AND #23                                                                                                                                                                                 | 220     |
| #25 | #24 last 10 years                                                                                                                                                                                  | 189     |

30 **Supplementary Table 3** Signs, symptoms and impacts relevant in PF-ILD identified by participants in  
 31 the online survey as pertinent to understanding PF-ILD

| Sign/symptom from the preliminary conceptual model* | Patient representatives (n=3) | Clinicians (n=5) | Payer advisors (n=2) | Regulatory advisors (n=2) | Consensus for priority <sup>#</sup> |
|-----------------------------------------------------|-------------------------------|------------------|----------------------|---------------------------|-------------------------------------|
| Change in appetite                                  |                               | 1 (EU)           | 0                    | 0                         |                                     |
| Chest congestion                                    |                               | 0                | 0                    | 1 (US)                    |                                     |
| Chest crackles                                      |                               | 0                | 0                    | 1 (EU)                    |                                     |
| Chest discomfort                                    |                               | 2 (US)           | 1 (US)               | 2 (EU/US)                 | Yes                                 |
| Chest pain                                          |                               | 0                | 2 (EU/US)            | 2 (EU/US)                 | Yes                                 |
| Constipation                                        |                               | 0                | 0                    | 1 (EU)                    |                                     |
| Cough                                               | 1 (EU)                        | 5 (EU/US)        | 2 (EU/US)            | 2 (EU/US)                 | Yes                                 |
| Difficulty bringing up phlegm/mucous                | 1 (EU)                        | 0                | 0                    | 1 (US)                    |                                     |
| Dizziness/light headedness                          | 1 (EU)                        | 0                | 0                    | 0                         | Yes                                 |
| Dry mouth                                           |                               | 0                | 0                    | 2 (EU/US)                 |                                     |
| Fatigue                                             | 1 (EU)                        | 4 (EU/US)        | 1 (EU)               | 2 (EU/US)                 | Yes                                 |
| Faecal incontinence/diarrhoea                       | 1 (EU)                        | 0                | 0                    | 1 (EU)                    |                                     |
| Fever                                               |                               | 0                | 1 (EU)               | 0                         |                                     |
| Finger/nail clubbing                                |                               | 0                | 0                    | 2 (EU/US)                 |                                     |
| Headaches                                           |                               | 0                | 1 (EU)               | 0                         |                                     |

Consensus of PROMs in PF-ILD manuscript (resubmission): February 2022

|                                                                     |                                              |                             |                                     |                                          |     |
|---------------------------------------------------------------------|----------------------------------------------|-----------------------------|-------------------------------------|------------------------------------------|-----|
| Itchy eyes                                                          |                                              | 0                           | 1 (EU)                              | 0                                        |     |
| Loss of appetite                                                    |                                              | 0                           | 0                                   | 2 (EU/US)                                |     |
| Nausea                                                              |                                              | 0                           | 1 (US)                              | 1 (EU)                                   |     |
| Other chest symptoms<br>(chest – tightness,<br>heaviness, pressure) |                                              | 1 (EU)                      | 2<br>(EU/US)                        | 2 (EU/US)                                | Yes |
| Pain                                                                |                                              | 0                           | 1 (EU)                              | 1 (EU)                                   |     |
| Producing<br>phlegm/mucous                                          |                                              | 0                           | 0                                   | 2 (EU/US)                                |     |
| Reduced nasal<br>congestion/runny nose                              | 1 (EU)                                       | 0                           | 0                                   | 0                                        | Yes |
| Reduced phlegm<br>symptoms                                          | 1 (EU)                                       | 0                           | 0                                   | 0                                        | Yes |
| Shortness of breath at<br>rest                                      | 1 (EU)                                       | 3 (EU/US)                   | 1 (US)                              | 2 (EU/US)                                | Yes |
| Shortness of breath on<br>exertion                                  | 2 (EU)                                       | 5 (EU/US)                   | 2<br>(EU/US)                        | 1 (US)                                   | Yes |
| Weight loss                                                         |                                              | 0                           | 0                                   | 1 (EU)                                   |     |
| Wheezing or whistling<br>sounds                                     |                                              | 0                           | 0                                   | 2 (EU/US)                                |     |
| <b>Impact from the<br/>preliminary<br/>conceptual model*</b>        | <b>Patient<br/>representatives<br/>(n=3)</b> | <b>Clinicians<br/>(n=5)</b> | <b>Payer<br/>advisors<br/>(n=2)</b> | <b>Regulatory<br/>advisors<br/>(n=2)</b> |     |
| Anxiety                                                             |                                              | 1 (US)                      | 1 (US)                              | 1 (EU)                                   | Yes |
| Ashamed/embarrassed                                                 |                                              | 1 (US)                      | 0                                   | 0                                        |     |



Consensus of PROMs in PF-ILD manuscript (resubmission): February 2022

|                                                            |        |           |           |           |     |
|------------------------------------------------------------|--------|-----------|-----------|-----------|-----|
| Concern with treatment-related adverse events/side effects |        | 0         | 0         | 1 (EU)    |     |
| Concerned for family                                       | 2 (EU) | 0         | 0         | 1 (EU)    | Yes |
| Decreased sexual life                                      |        | 0         | 0         | 1 (EU)    |     |
| Denial about the disease                                   |        | 1 (EU)    | 0         | 0         |     |
| Depression                                                 |        | 1 (US)    | 1 (US)    | 1 (EU)    | Yes |
| Difficulty in understanding the implication of disease     | 1 (EU) | 1 (EU)    | 0         | 0         | Yes |
| Emotional impact (overall)                                 | 1 (EU) | 2 (EU/US) | 2 (EU/US) | 1 (EU)    | Yes |
| Fear                                                       |        | 0         | 0         | 1 (EU)    |     |
| Fear of infection                                          | 1 (EU) | 1 (EU)    |           | 1 (EU)    | Yes |
| Feeling grief                                              |        | 1 (US)    | 0         | 0         |     |
| Hesitance to engage in advance care planning               |        | 0         | 1 (US)    | 0         |     |
| Impact on ADLs                                             | 1 (EU) | 3 (EU/US) | 2 (EU/US) | 2 (EU/US) | Yes |
| Impact on social activities/travel/holidays                |        | 0         | 0         | 1 (EU)    |     |
| Impact on social life                                      |        | 0         | 1 (EU)    | 1 (EU)    |     |
| Impaired sleep                                             |        | 0         | 1 (EU)    | 2 (EU/US) |     |
| Inconvenience due to                                       |        | 0         | 0         | 1 (EU)    |     |

|                                                  |        |           |        |           |     |
|--------------------------------------------------|--------|-----------|--------|-----------|-----|
| use of oxygen cylinder                           |        |           |        |           |     |
| Loss of independence/freedom                     |        | 3 (EU/US) | 0      | 0         | Yes |
| Low physical activity/loss of functional ability | 2 (EU) | 3 (EU/US) | 0      | 2 (EU/US) | Yes |
| Oxygen use having impact on ADLs                 | 1 (EU) | 1 (US)    | 0      | 1 (EU)    | Yes |
| Panic                                            |        | 0         | 1 (US) | 0         |     |
| Stigma/shame associated with oxygen use          |        | 1 (EU)    | 0      | 0         |     |
| Thoughts of death                                |        | 2 (EU/US) | 0      | 0         | Yes |
| Uncertainty on disease progression               | 1 (EU) | 3 (EU/US) | 0      | 1 (EU)    | Yes |

32 The table lists only those signs and symptoms that were selected by at least one stakeholder.

33 \*Preliminary conceptual model developed from the SLR.

34 #Concepts for inclusion in the first consensus meeting were selected based on the number of stakeholders who indicated  
 35 concept as important in the online survey and prioritisation by clinical experts and patient representatives.

36 ADL, activities of daily living; EU, European Union; PF-ILD, progressive fibrosing interstitial lung disease; reps, representatives;

37 US, United States.

38 **Supplementary Figure 1** PRISMA flow diagram with the identified studies

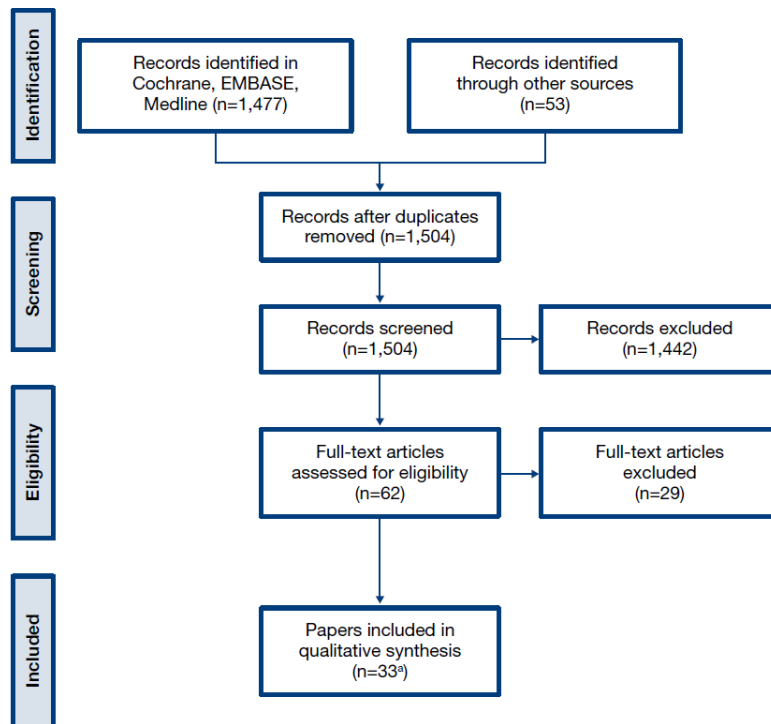

39

40 <sup>a</sup>Including 49 entries in 10 patient blogs. Each blog (not the entry) was considered as a hit in the  
41 PRISMA flow.
